# Supplementary material for: Transcriptomic Profiling of Duodenal Epithelium Reveals Temporally Dynamic Impacts of Direct Duodenal Starch-Infusion During Dry Period of Dairy Cattle
Source: Front Vet Sci. 2019 Jul 2;6:214. doi: 10.3389/fvets.2019.00214 (PMC6614288; doi:10.3389/fvets.2019.00214)
Supplement: Supplementary Table 3 — GO terms (Molecular Function) enriched for DEGs. [file Table_3.XLSX]

## Sheet: Sheet1
	D3_GO_MolecularFunction
	ID	Description	GeneRatio	BgRatio	pvalue	p.adjust	qvalue	geneID	Count
	GO:0003674	molecular_function	54/54	4363/5527	2.65308e-06	0.000578372	0.000519445	ADM/CA4/DES/MTTP/SCD/GRO1/CXCL2/IL1A/IL1B/ODC1/PLAT/CRYAB/CXCL5/IKBKB/SOCS3/ADAMTS2/ITGB6/PCK1/SLC2A5/AURKB/HSDL2/FADD/TK1/OAT/ADH5/SLC5A12/APIP/STAT3/SCP2/ASPA/TRMT61A/ABHD1/ARL2/PYCRL/OLFML2B/FABP2/HDC/AADAC/CCND1/TSPAN13/ACSS3/CAT/ENTPD5/ACTC1/ZC3H12A/G6PC/MARCKSL1/CMKLR1/ZMAT5/CISH/SCN1B/ZNF181/GSTA3/THEM4	54
	GO:0005126	cytokine receptor binding	6/54	83/5527	0.000138813	0.0105176	0.009446	GRO1/CXCL2/IL1A/IL1B/CXCL5/FADD	6
	GO:0042802	identical protein binding	11/54	307/5527	0.000144737	0.0105176	0.009446	DES/ODC1/CRYAB/IKBKB/FADD/TK1/OAT/ADH5/APIP/PYCRL/CAT	11
	GO:0008009	chemokine activity	3/54	17/5527	0.000544241	0.0256028	0.0229943	GRO1/CXCL2/CXCL5	3
	GO:0005125	cytokine activity	5/54	75/5527	0.000757657	0.0256028	0.0229943	GRO1/CXCL2/IL1A/IL1B/CXCL5	5
	GO:0016831	carboxy-lyase activity	3/54	19/5527	0.000764891	0.0256028	0.0229943	ODC1/PCK1/HDC	3
	GO:0003824	catalytic activity	30/54	1872/5527	0.000822108	0.0256028	0.0229943	CA4/SCD/ODC1/PLAT/IKBKB/ADAMTS2/PCK1/AURKB/HSDL2/TK1/OAT/ADH5/APIP/SCP2/ASPA/TRMT61A/ABHD1/ARL2/PYCRL/HDC/AADAC/CCND1/ACSS3/CAT/ENTPD5/ACTC1/ZC3H12A/G6PC/GSTA3/THEM4	30
	GO:0042379	chemokine receptor binding	3/54	21/5527	0.00103544	0.0282157	0.025341	GRO1/CXCL2/CXCL5	3
	GO:0016829	lyase activity	5/54	84/5527	0.00126813	0.0298809	0.0268365	CA4/ODC1/PCK1/APIP/HDC	5
	GO:0005149	interleukin-1 receptor binding	2/54	6/5527	0.00137068	0.0298809	0.0268365	IL1A/IL1B	2
	GO:0045236	CXCR chemokine receptor binding	2/54	7/5527	0.00190695	0.035525	0.0319056	CXCL2/CXCL5	2
	GO:0016830	carbon-carbon lyase activity	3/54	26/5527	0.0019555	0.035525	0.0319056	ODC1/PCK1/HDC	3
	GO:0005102	receptor binding	10/54	361/5527	0.00223973	0.0375585	0.0337319	ADM/GRO1/CXCL2/IL1A/IL1B/PLAT/CXCL5/ITGB6/FADD/CAT	10
	D7_GO_MolecularFunction
	ID	Description	GeneRatio	BgRatio	pvalue	p.adjust	qvalue	geneID	Count
	GO:0003674	molecular_function	382/382	4363/5527	1.43507e-41	7.46238e-39	6.54091e-39	C29H11orf68/SCO2/NUDT14/INSM1/COX7B/TIGD5/F5/ADM/DBT/DES/ELN/GAA/JUN/KIT/MIF/MUT/TNF/VWF/CROT/CYBA/FASN/GNB2/GUK1/FURIN/PON2/PRNP/DAG1/ROM1/SMN2/UGDH/ACTR3/AK3/CLTB/COPB2/EIF4E/FCGR3A/GSTP1/HIF1A/HINT3/IGF2R/KITLG/LOXL1/LOXL4/MTIF2/PDE1A/POLD1/PPM1A/PTGS2/ACVR2B/ATP6V1A/BCKDHA/CYP2D14/PIK3CA/PIK3R2/TXNRD2/UQCRC2/ADAMTS2/PAFAH1B1/PAFAH1B3/GDF9/ARPP19/CEP290/FUT4/CTSD/PTPRN/EIF4A2/RPS29/NOS3/NDUFS8…	382
	GO:0005488	binding	304/382	3268/5527	1.33616e-18	3.47403e-16	3.04505e-16	C29H11orf68/SCO2/NUDT14/INSM1/TIGD5/F5/ADM/DBT/DES/GAA/JUN/KIT/MIF/MUT/TNF/VWF/CYBA/GNB2/GUK1/FURIN/PON2/PRNP/DAG1/ROM1/SMN2/UGDH/ACTR3/AK3/CLTB/COPB2/EIF4E/FCGR3A/GSTP1/HIF1A/HINT3/IGF2R/KITLG/LOXL1/LOXL4/MTIF2/PDE1A/POLD1/PPM1A/PTGS2/ACVR2B/ATP6V1A/BCKDHA/CYP2D14/PIK3CA/PIK3R2/TXNRD2/UQCRC2/ADAMTS2/PAFAH1B1/PAFAH1B3/GDF9/ARPP19/CEP290/PTPRN/EIF4A2/RPS29/NOS3/NDUFS8/NDUFS1/USO1/ENDOG/RAP1B/PAPOL…	304
	GO:0003824	catalytic activity	198/382	1872/5527	5.37027e-14	9.30847e-12	8.15904e-12	NUDT14/COX7B/DBT/GAA/KIT/MIF/MUT/CROT/CYBA/FASN/GNB2/GUK1/FURIN/PON2/UGDH/AK3/GSTP1/HINT3/LOXL1/LOXL4/MTIF2/PDE1A/POLD1/PPM1A/PTGS2/ACVR2B/ATP6V1A/BCKDHA/CYP2D14/PIK3CA/PIK3R2/TXNRD2/UQCRC2/ADAMTS2/PAFAH1B3/FUT4/CTSD/EIF4A2/NOS3/NDUFS8/NDUFS1/ENDOG/RAP1B/ND4L/PAPOLA/NDUFS7/ATP6V1C1/PC/RHOT2/TRDMT1/AURKB/STK25/NAPRT/ATG4B/CASP3/ST3GAL6/MGST1/XYLT2/MBOAT7/PBLD/GPD2/ARSA/FXN/ACADM/ATAD1/OMA1/PTGR2/R…	198
	GO:0043167	ion binding	179/382	1678/5527	1.57859e-12	2.05217e-10	1.79877e-10	SCO2/NUDT14/INSM1/F5/KIT/MUT/CYBA/GUK1/FURIN/PON2/PRNP/DAG1/ACTR3/AK3/LOXL1/LOXL4/MTIF2/PDE1A/POLD1/PPM1A/PTGS2/ACVR2B/ATP6V1A/BCKDHA/CYP2D14/PIK3CA/TXNRD2/UQCRC2/ADAMTS2/PAFAH1B1/EIF4A2/RPS29/NOS3/NDUFS8/NDUFS1/ENDOG/RAP1B/PAPOLA/NDUFS7/PC/RHOT2/AURKB/STK25/SEPT7/ATP5S/ARHGAP29/GATA5/GPD2/RABL3/ARSA/FXN/ACADM/ATAD1/OMA1/RARS/TWF1/NR1H3/PHOSPHO2/RNF126/THAP4/TDP2/APLF/C16H1orf86/RABL6/APIP/PFKL/A…	179
	GO:0046872	metal ion binding	119/382	1066/5527	5.98603e-09	6.22547e-07	5.45674e-07	SCO2/NUDT14/INSM1/F5/KIT/MUT/CYBA/FURIN/PON2/PRNP/DAG1/LOXL1/LOXL4/PDE1A/POLD1/PPM1A/PTGS2/ACVR2B/BCKDHA/CYP2D14/UQCRC2/ADAMTS2/RPS29/NOS3/NDUFS8/NDUFS1/ENDOG/PAPOLA/NDUFS7/PC/RHOT2/AURKB/STK25/ATP5S/ARHGAP29/GATA5/GPD2/ARSA/FXN/OMA1/NR1H3/PHOSPHO2/RNF126/THAP4/TDP2/APLF/C16H1orf86/APIP/PFKL/ASPA/OLA1/FHL2/ZGPAT/ACAT1/SUCLA2/CXXC1/REPIN1/HGS/GTF2H3/NUDT16/SHARPIN/LIMK2/HPCAL1/NDOR1/EFHD2/RNF186/E…	119
	GO:0043169	cation binding	119/382	1086/5527	1.88963e-08	1.63768e-06	1.43546e-06	SCO2/NUDT14/INSM1/F5/KIT/MUT/CYBA/FURIN/PON2/PRNP/DAG1/LOXL1/LOXL4/PDE1A/POLD1/PPM1A/PTGS2/ACVR2B/BCKDHA/CYP2D14/UQCRC2/ADAMTS2/RPS29/NOS3/NDUFS8/NDUFS1/ENDOG/PAPOLA/NDUFS7/PC/RHOT2/AURKB/STK25/ATP5S/ARHGAP29/GATA5/GPD2/ARSA/FXN/OMA1/NR1H3/PHOSPHO2/RNF126/THAP4/TDP2/APLF/C16H1orf86/APIP/PFKL/ASPA/OLA1/FHL2/ZGPAT/ACAT1/SUCLA2/CXXC1/REPIN1/HGS/GTF2H3/NUDT16/SHARPIN/LIMK2/HPCAL1/NDOR1/EFHD2/RNF186/E…	119
	GO:0035639	purine ribonucleoside triphosphate binding	67/382	538/5527	6.7278e-07	3.29374e-05	2.88702e-05	KIT/GUK1/ACTR3/AK3/MTIF2/ACVR2B/ATP6V1A/PIK3CA/EIF4A2/RAP1B/PAPOLA/PC/RHOT2/AURKB/STK25/SEPT7/RABL3/ATAD1/RARS/RABL6/PFKL/MVD/CMPK1/OLA1/TARS/DARS/SUCLA2/RAB18/ARL2/HSPD1/NUDT16/RHOC/LIMK2/CLCN7/ENTPD8/NUBP2/RAB26/SAR1B/HSPA9/PSMC6/ARL5A/GUF1/NMNAT1/RIOK3/GFM2/MAP3K7/ORC4/SMARCAD1/DCK/GALK1/ACSS3/RAB11B/QRSL1/IRAK4/PAPD4/RAB11A/TUBA3E/ABCG2/MAPK7/DNM1L/HBS1L/UBE2W/GTPBP10/CARKD/RAB8B/UBE2S/XRCC3	67
	GO:0032553	ribonucleotide binding	69/382	561/5527	7.12094e-07	3.29374e-05	2.88702e-05	KIT/GUK1/ACTR3/AK3/MTIF2/ACVR2B/ATP6V1A/PIK3CA/EIF4A2/NOS3/RAP1B/PAPOLA/PC/RHOT2/AURKB/STK25/SEPT7/RABL3/ATAD1/RARS/RABL6/PFKL/MVD/CMPK1/OLA1/TARS/DARS/SUCLA2/RAB18/ARL2/HSPD1/NUDT16/RHOC/LIMK2/CLCN7/NDOR1/ENTPD8/NUBP2/RAB26/SAR1B/HSPA9/PSMC6/ARL5A/GUF1/NMNAT1/RIOK3/GFM2/MAP3K7/ORC4/SMARCAD1/DCK/GALK1/ACSS3/RAB11B/QRSL1/IRAK4/PAPD4/RAB11A/TUBA3E/ABCG2/MAPK7/DNM1L/HBS1L/UBE2W/GTPBP10/CARKD/RAB8B/U…	69
	GO:0032549	ribonucleoside binding	67/382	540/5527	7.72821e-07	3.29374e-05	2.88702e-05	KIT/GUK1/ACTR3/AK3/MTIF2/ACVR2B/ATP6V1A/PIK3CA/EIF4A2/RAP1B/PAPOLA/PC/RHOT2/AURKB/STK25/SEPT7/RABL3/ATAD1/RARS/RABL6/PFKL/MVD/CMPK1/OLA1/TARS/DARS/SUCLA2/RAB18/ARL2/HSPD1/NUDT16/RHOC/LIMK2/CLCN7/ENTPD8/NUBP2/RAB26/SAR1B/HSPA9/PSMC6/ARL5A/GUF1/NMNAT1/RIOK3/GFM2/MAP3K7/ORC4/SMARCAD1/DCK/GALK1/ACSS3/RAB11B/QRSL1/IRAK4/PAPD4/RAB11A/TUBA3E/ABCG2/MAPK7/DNM1L/HBS1L/UBE2W/GTPBP10/CARKD/RAB8B/UBE2S/XRCC3	67
	GO:0032550	purine ribonucleoside binding	67/382	540/5527	7.72821e-07	3.29374e-05	2.88702e-05	KIT/GUK1/ACTR3/AK3/MTIF2/ACVR2B/ATP6V1A/PIK3CA/EIF4A2/RAP1B/PAPOLA/PC/RHOT2/AURKB/STK25/SEPT7/RABL3/ATAD1/RARS/RABL6/PFKL/MVD/CMPK1/OLA1/TARS/DARS/SUCLA2/RAB18/ARL2/HSPD1/NUDT16/RHOC/LIMK2/CLCN7/ENTPD8/NUBP2/RAB26/SAR1B/HSPA9/PSMC6/ARL5A/GUF1/NMNAT1/RIOK3/GFM2/MAP3K7/ORC4/SMARCAD1/DCK/GALK1/ACSS3/RAB11B/QRSL1/IRAK4/PAPD4/RAB11A/TUBA3E/ABCG2/MAPK7/DNM1L/HBS1L/UBE2W/GTPBP10/CARKD/RAB8B/UBE2S/XRCC3	67
	GO:0000166	nucleotide binding	82/382	711/5527	8.18418e-07	3.29374e-05	2.88702e-05	KIT/GUK1/UGDH/ACTR3/AK3/HINT3/MTIF2/POLD1/ACVR2B/ATP6V1A/PIK3CA/TXNRD2/EIF4A2/NOS3/RAP1B/PAPOLA/PC/RHOT2/AURKB/STK25/SEPT7/RABL3/ACADM/ATAD1/RARS/APLF/RABL6/PFKL/DHFR/MVD/CMPK1/OLA1/TARS/DARS/SUCLA2/RAB18/ARL2/HSPD1/HPGD/NUDT16/RHOC/CELF3/LIMK2/CLCN7/SLC27A1/NDOR1/GRPEL2/ENTPD8/NUBP2/RAB26/SAR1B/HSPA9/PSMC6/ARL5A/ETFA/GUF1/NMNAT1/RIOK3/GFM2/MAP3K7/ORC4/SMARCAD1/DCK/GALK1/ACSS3/RAB11B/QRSL1/IRAK4/…	82
	GO:1901265	nucleoside phosphate binding	82/382	711/5527	8.18418e-07	3.29374e-05	2.88702e-05	KIT/GUK1/UGDH/ACTR3/AK3/HINT3/MTIF2/POLD1/ACVR2B/ATP6V1A/PIK3CA/TXNRD2/EIF4A2/NOS3/RAP1B/PAPOLA/PC/RHOT2/AURKB/STK25/SEPT7/RABL3/ACADM/ATAD1/RARS/APLF/RABL6/PFKL/DHFR/MVD/CMPK1/OLA1/TARS/DARS/SUCLA2/RAB18/ARL2/HSPD1/HPGD/NUDT16/RHOC/CELF3/LIMK2/CLCN7/SLC27A1/NDOR1/GRPEL2/ENTPD8/NUBP2/RAB26/SAR1B/HSPA9/PSMC6/ARL5A/ETFA/GUF1/NMNAT1/RIOK3/GFM2/MAP3K7/ORC4/SMARCAD1/DCK/GALK1/ACSS3/RAB11B/QRSL1/IRAK4/…	82
	GO:0001883	purine nucleoside binding	67/382	541/5527	8.27952e-07	3.29374e-05	2.88702e-05	KIT/GUK1/ACTR3/AK3/MTIF2/ACVR2B/ATP6V1A/PIK3CA/EIF4A2/RAP1B/PAPOLA/PC/RHOT2/AURKB/STK25/SEPT7/RABL3/ATAD1/RARS/RABL6/PFKL/MVD/CMPK1/OLA1/TARS/DARS/SUCLA2/RAB18/ARL2/HSPD1/NUDT16/RHOC/LIMK2/CLCN7/ENTPD8/NUBP2/RAB26/SAR1B/HSPA9/PSMC6/ARL5A/GUF1/NMNAT1/RIOK3/GFM2/MAP3K7/ORC4/SMARCAD1/DCK/GALK1/ACSS3/RAB11B/QRSL1/IRAK4/PAPD4/RAB11A/TUBA3E/ABCG2/MAPK7/DNM1L/HBS1L/UBE2W/GTPBP10/CARKD/RAB8B/UBE2S/XRCC3	67
	GO:0001882	nucleoside binding	67/382	542/5527	8.86776e-07	3.29374e-05	2.88702e-05	KIT/GUK1/ACTR3/AK3/MTIF2/ACVR2B/ATP6V1A/PIK3CA/EIF4A2/RAP1B/PAPOLA/PC/RHOT2/AURKB/STK25/SEPT7/RABL3/ATAD1/RARS/RABL6/PFKL/MVD/CMPK1/OLA1/TARS/DARS/SUCLA2/RAB18/ARL2/HSPD1/NUDT16/RHOC/LIMK2/CLCN7/ENTPD8/NUBP2/RAB26/SAR1B/HSPA9/PSMC6/ARL5A/GUF1/NMNAT1/RIOK3/GFM2/MAP3K7/ORC4/SMARCAD1/DCK/GALK1/ACSS3/RAB11B/QRSL1/IRAK4/PAPD4/RAB11A/TUBA3E/ABCG2/MAPK7/DNM1L/HBS1L/UBE2W/GTPBP10/CARKD/RAB8B/UBE2S/XRCC3	67
	GO:0016740	transferase activity	74/382	623/5527	1.03814e-06	3.59887e-05	3.15448e-05	DBT/KIT/CROT/FASN/GUK1/AK3/GSTP1/POLD1/ACVR2B/PIK3CA/PIK3R2/PAFAH1B3/FUT4/PAPOLA/TRDMT1/AURKB/STK25/NAPRT/ST3GAL6/MGST1/XYLT2/MBOAT7/KLHL21/TWF1/RNF126/KCTD13/PFKL/SCP2/THUMPD3/DPM3/CMPK1/TRMT61A/TRPT1/PRIMPOL/ACAT1/CXXC1/GTF2H3/GGACT/LIMK2/UFL1/ERCC8/SULT1B1/NMNAT1/RIOK3/CCND1/HACE1/MAP3K7/HYKK/DCK/GALK1/METTL14/TRMT10C/TAF9/ZDHHC5/RABGGTB/IRAK4/PAPD4/POLR2F/ZDHHC21/MAPK7/TRIM2/RNF13/GPT/MARCH5/…	74
	GO:0017076	purine nucleotide binding	68/382	558/5527	1.23178e-06	4.00329e-05	3.50896e-05	KIT/GUK1/ACTR3/AK3/MTIF2/ACVR2B/ATP6V1A/PIK3CA/EIF4A2/RAP1B/PAPOLA/PC/RHOT2/AURKB/STK25/SEPT7/RABL3/ATAD1/RARS/RABL6/PFKL/MVD/CMPK1/OLA1/TARS/DARS/SUCLA2/RAB18/ARL2/HSPD1/NUDT16/RHOC/LIMK2/CLCN7/GRPEL2/ENTPD8/NUBP2/RAB26/SAR1B/HSPA9/PSMC6/ARL5A/GUF1/NMNAT1/RIOK3/GFM2/MAP3K7/ORC4/SMARCAD1/DCK/GALK1/ACSS3/RAB11B/QRSL1/IRAK4/PAPD4/RAB11A/TUBA3E/ABCG2/MAPK7/DNM1L/HBS1L/UBE2W/GTPBP10/CARKD/RAB8B/UBE2S…	68
	GO:1901363	heterocyclic compound binding	150/382	1574/5527	1.62079e-06	4.95772e-05	4.34553e-05	C29H11orf68/INSM1/TIGD5/JUN/KIT/MUT/TNF/CYBA/GUK1/SMN2/UGDH/ACTR3/AK3/EIF4E/HIF1A/HINT3/MTIF2/POLD1/PTGS2/ACVR2B/ATP6V1A/CYP2D14/PIK3CA/TXNRD2/EIF4A2/NOS3/USO1/ENDOG/RAP1B/PAPOLA/PC/RHOT2/TRDMT1/AURKB/STK25/SEPT7/SF3A1/GATA5/RABL3/TAF1D/ACADM/ATAD1/RARS/NR1H3/PHAX/THAP4/TDP2/APLF/RABL6/PFKL/DHFR/THUMPD3/NMD3/MVD/CMPK1/OLA1/TARS/DARS/CCDC124/ZGPAT/SUCLA2/RAB18/NOSIP/DNTTIP2/ARL2/CXXC1/REPIN1/HSPD1…	150
	GO:0032555	purine ribonucleotide binding	67/382	553/5527	1.85394e-06	5.35584e-05	4.69449e-05	KIT/GUK1/ACTR3/AK3/MTIF2/ACVR2B/ATP6V1A/PIK3CA/EIF4A2/RAP1B/PAPOLA/PC/RHOT2/AURKB/STK25/SEPT7/RABL3/ATAD1/RARS/RABL6/PFKL/MVD/CMPK1/OLA1/TARS/DARS/SUCLA2/RAB18/ARL2/HSPD1/NUDT16/RHOC/LIMK2/CLCN7/ENTPD8/NUBP2/RAB26/SAR1B/HSPA9/PSMC6/ARL5A/GUF1/NMNAT1/RIOK3/GFM2/MAP3K7/ORC4/SMARCAD1/DCK/GALK1/ACSS3/RAB11B/QRSL1/IRAK4/PAPD4/RAB11A/TUBA3E/ABCG2/MAPK7/DNM1L/HBS1L/UBE2W/GTPBP10/CARKD/RAB8B/UBE2S/XRCC3	67
	GO:0097159	organic cyclic compound binding	151/382	1596/5527	2.31116e-06	6.32529e-05	5.54423e-05	C29H11orf68/INSM1/TIGD5/JUN/KIT/MUT/TNF/CYBA/GUK1/SMN2/UGDH/ACTR3/AK3/EIF4E/HIF1A/HINT3/MTIF2/POLD1/PTGS2/ACVR2B/ATP6V1A/CYP2D14/PIK3CA/TXNRD2/EIF4A2/NOS3/USO1/ENDOG/RAP1B/PAPOLA/PC/RHOT2/TRDMT1/AURKB/STK25/SEPT7/SF3A1/GATA5/RABL3/TAF1D/ACADM/ATAD1/RARS/NR1H3/PHAX/THAP4/TDP2/APLF/RABL6/PFKL/DHFR/SCP2/THUMPD3/NMD3/MVD/CMPK1/OLA1/TARS/DARS/CCDC124/ZGPAT/SUCLA2/RAB18/NOSIP/DNTTIP2/ARL2/CXXC1/REPIN1/…	151
	GO:0097367	carbohydrate derivative binding	75/382	655/5527	3.61531e-06	9.3998e-05	8.23909e-05	KIT/VWF/GUK1/ACTR3/AK3/IGF2R/MTIF2/ACVR2B/ATP6V1A/PIK3CA/PAFAH1B1/EIF4A2/NOS3/RAP1B/PAPOLA/PC/RHOT2/AURKB/STK25/SEPT7/RABL3/ATAD1/RARS/RABL6/PFKL/MVD/CMPK1/OLA1/TARS/DARS/SUCLA2/RAB18/ARL2/HSPD1/NUDT16/RHOC/LIMK2/CLCN7/NDOR1/PSMA1/ENTPD8/NUBP2/RAB26/SAR1B/HSPA9/GPC1/PSMC6/ARL5A/GUF1/NMNAT1/RIOK3/GFM2/MAP3K7/ORC4/SMARCAD1/DCK/GALK1/ACSS3/RAB11B/QRSL1/IRAK4/PAPD4/RAB11A/TUBA3E/ABCG2/MAPK7/DNM1L/HBS…	75
	GO:0036094	small molecule binding	85/382	799/5527	1.42541e-05	0.000352958	0.000309374	KIT/MUT/GUK1/UGDH/ACTR3/AK3/HINT3/IGF2R/MTIF2/POLD1/ACVR2B/ATP6V1A/PIK3CA/TXNRD2/EIF4A2/NOS3/RAP1B/PAPOLA/PC/RHOT2/AURKB/STK25/SEPT7/RABL3/ACADM/ATAD1/RARS/APLF/RABL6/PFKL/DHFR/SCP2/MVD/CMPK1/OLA1/TARS/DARS/SUCLA2/RAB18/ARL2/HSPD1/HPGD/NUDT16/RHOC/CELF3/LIMK2/CLCN7/SLC27A1/NDOR1/GRPEL2/ENTPD8/NUBP2/RAB26/SAR1B/HSPA9/PSMC6/ARL5A/ETFA/GUF1/NMNAT1/RIOK3/GFM2/MAP3K7/ORC4/SMARCAD1/DCK/GALK1/ACSS3/RAB1…	85
	GO:0043168	anion binding	83/382	792/5527	3.28328e-05	0.000776048	0.00068022	KIT/GUK1/ACTR3/AK3/MTIF2/ACVR2B/ATP6V1A/PIK3CA/TXNRD2/PAFAH1B1/EIF4A2/NOS3/RAP1B/PAPOLA/PC/RHOT2/AURKB/STK25/SEPT7/RABL3/ACADM/ATAD1/RARS/TWF1/RABL6/PFKL/SNX2/MVD/CMPK1/OLA1/TARS/DARS/SUCLA2/RAB18/ARL2/HSPD1/HPGD/NUDT16/RHOC/LIMK2/CLCN7/NDOR1/ENTPD8/NUBP2/RAB26/SAR1B/HSPA9/GPC1/PSMC6/SNX4/ARL5A/ETFA/GUF1/NMNAT1/RIOK3/GFM2/MAP3K7/ORC4/C2CD4B/SMARCAD1/DCK/GALK1/ACSS3/RAB11B/QRSL1/IRAK4/PAPD4/RAB11A…	83
	GO:0016787	hydrolase activity	81/382	775/5527	4.63517e-05	0.00104795	0.000918548	NUDT14/GAA/FASN/GNB2/FURIN/PON2/HINT3/MTIF2/PDE1A/POLD1/PPM1A/ATP6V1A/UQCRC2/ADAMTS2/PAFAH1B3/CTSD/EIF4A2/ENDOG/RAP1B/ATP6V1C1/RHOT2/ATG4B/CASP3/ARSA/ATAD1/OMA1/PHOSPHO2/TDP2/SENP7/APLF/PNPLA2/ASPA/OLA1/RAB18/ARL2/GTF2H3/SCRN3/NUDT16/BRMS1L/DCP1B/PSMA1/ENTPD8/USP1/PSMC6/AADAC/USP16/AMDHD2/ADPRHL2/GUF1/GFM2/MMP23B/RPAP2/SMARCAD1/C29H11orf54/USP33/RAB11B/ENTPD5/BCHE/RAB11A/TUBA3E/LACTB2/ZC3H12A/ABC…	81
	GO:0005515	protein binding	136/382	1506/5527	0.000128306	0.00277996	0.00243669	ADM/DBT/DES/KIT/MIF/TNF/VWF/CYBA/GNB2/PON2/PRNP/DAG1/ROM1/ACTR3/CLTB/COPB2/EIF4E/FCGR3A/HIF1A/IGF2R/KITLG/PDE1A/PPM1A/PIK3CA/PIK3R2/PAFAH1B1/PAFAH1B3/GDF9/ARPP19/CEP290/PTPRN/NOS3/USO1/STC1/COPE/CLDN3/IGFBP5/ASIP/JUP/CAPZA2/ARHGAP29/GATA5/FAM175A/TONSL/VWA1/TWF1/NR1H3/RNF126/KCTD13/C16H1orf86/APIP/PFKL/EIF4EBP1/CCNC/NMD3/MVD/FHL2/ASF1B/NRM/ARL2/SHOC2/HGS/RABEP2/GTF2H3/HSPD1/NUDT16/SHARPIN/PYCRL/R…	136
	GO:0005525	GTP binding	24/382	162/5527	0.000271643	0.00565017	0.00495247	AK3/MTIF2/RAP1B/RHOT2/SEPT7/RABL3/RABL6/OLA1/RAB18/ARL2/NUDT16/RHOC/RAB26/SAR1B/ARL5A/GUF1/GFM2/RAB11B/RAB11A/TUBA3E/DNM1L/HBS1L/GTPBP10/RAB8B	24
	GO:0005524	ATP binding	45/382	389/5527	0.000330432	0.00660068	0.00578561	KIT/GUK1/ACTR3/AK3/ACVR2B/ATP6V1A/PIK3CA/EIF4A2/PAPOLA/PC/AURKB/STK25/ATAD1/RARS/PFKL/MVD/CMPK1/OLA1/TARS/DARS/SUCLA2/HSPD1/LIMK2/CLCN7/ENTPD8/NUBP2/HSPA9/PSMC6/NMNAT1/RIOK3/MAP3K7/ORC4/SMARCAD1/DCK/GALK1/ACSS3/QRSL1/IRAK4/PAPD4/ABCG2/MAPK7/UBE2W/CARKD/UBE2S/XRCC3	45
	GO:0030554	adenyl nucleotide binding	46/382	401/5527	0.000342727	0.00660068	0.00578561	KIT/GUK1/ACTR3/AK3/ACVR2B/ATP6V1A/PIK3CA/EIF4A2/PAPOLA/PC/AURKB/STK25/ATAD1/RARS/PFKL/MVD/CMPK1/OLA1/TARS/DARS/SUCLA2/HSPD1/LIMK2/CLCN7/GRPEL2/ENTPD8/NUBP2/HSPA9/PSMC6/NMNAT1/RIOK3/MAP3K7/ORC4/SMARCAD1/DCK/GALK1/ACSS3/QRSL1/IRAK4/PAPD4/ABCG2/MAPK7/UBE2W/CARKD/UBE2S/XRCC3	46
	GO:0016747	transferase activity, transferring acyl groups other than amino-acyl groups	13/382	65/5527	0.000403752	0.00749825	0.00657235	DBT/CROT/FASN/PAFAH1B3/MBOAT7/SCP2/ACAT1/TAF9/ZDHHC5/ZDHHC21/TEX30/SPTLC1/SPTSSA	13
	GO:0046914	transition metal ion binding	43/382	373/5527	0.000486222	0.00871845	0.00764188	SCO2/F5/PRNP/LOXL1/LOXL4/PPM1A/CYP2D14/UQCRC2/ADAMTS2/NOS3/PAPOLA/GATA5/FXN/NR1H3/RNF126/TDP2/APIP/FHL2/CXXC1/NUDT16/SHARPIN/LIMK2/NDOR1/RNF186/GPC1/USP16/LMO1/MMP23B/PCGF5/C29H11orf54/USP33/LOXL2/ZDHHC5/RABGGTB/PDLIM7/SEC23A/ZDHHC21/ZMYM5/CYLD/TRIM2/RNF13/NR1H4/MARCH5	43
	GO:0032559	adenyl ribonucleotide binding	45/382	397/5527	0.000520125	0.0090155	0.00790225	KIT/GUK1/ACTR3/AK3/ACVR2B/ATP6V1A/PIK3CA/EIF4A2/PAPOLA/PC/AURKB/STK25/ATAD1/RARS/PFKL/MVD/CMPK1/OLA1/TARS/DARS/SUCLA2/HSPD1/LIMK2/CLCN7/ENTPD8/NUBP2/HSPA9/PSMC6/NMNAT1/RIOK3/MAP3K7/ORC4/SMARCAD1/DCK/GALK1/ACSS3/QRSL1/IRAK4/PAPD4/ABCG2/MAPK7/UBE2W/CARKD/UBE2S/XRCC3	45
	GO:0032561	guanyl ribonucleotide binding	24/382	171/5527	0.000614081	0.0103007	0.00902877	AK3/MTIF2/RAP1B/RHOT2/SEPT7/RABL3/RABL6/OLA1/RAB18/ARL2/NUDT16/RHOC/RAB26/SAR1B/ARL5A/GUF1/GFM2/RAB11B/RAB11A/TUBA3E/DNM1L/HBS1L/GTPBP10/RAB8B	24
	GO:0019001	guanyl nucleotide binding	24/382	172/5527	0.000669058	0.0108722	0.00952968	AK3/MTIF2/RAP1B/RHOT2/SEPT7/RABL3/RABL6/OLA1/RAB18/ARL2/NUDT16/RHOC/RAB26/SAR1B/ARL5A/GUF1/GFM2/RAB11B/RAB11A/TUBA3E/DNM1L/HBS1L/GTPBP10/RAB8B	24
	GO:0016772	transferase activity, transferring phosphorus-containing groups	30/382	237/5527	0.00079662	0.0125528	0.0110028	KIT/GUK1/AK3/POLD1/ACVR2B/PIK3CA/PIK3R2/PAPOLA/AURKB/STK25/TWF1/PFKL/CMPK1/TRPT1/PRIMPOL/GTF2H3/LIMK2/NMNAT1/RIOK3/CCND1/MAP3K7/HYKK/DCK/GALK1/IRAK4/PAPD4/POLR2F/MAPK7/CTU2/CCNH	30
	GO:0016408	C-acyltransferase activity	4/382	8/5527	0.00125762	0.0192342	0.0168591	SCP2/ACAT1/SPTLC1/SPTSSA	4
	GO:0016746	transferase activity, transferring acyl groups	14/382	83/5527	0.00145936	0.021682	0.0190046	DBT/CROT/FASN/PAFAH1B3/MBOAT7/SCP2/ACAT1/GGACT/TAF9/ZDHHC5/ZDHHC21/TEX30/SPTLC1/SPTSSA	14
	GO:0005507	copper ion binding	7/382	27/5527	0.00188611	0.0272438	0.0238796	SCO2/F5/PRNP/LOXL1/LOXL4/GPC1/LOXL2	7
	GO:0003924	GTPase activity	14/382	87/5527	0.00231749	0.0325701	0.0285483	GNB2/MTIF2/RAP1B/RHOT2/RAB18/ARL2/GUF1/GFM2/RAB11B/RAB11A/TUBA3E/DNM1L/HBS1L/GTPBP10	14
	GO:0016301	kinase activity	22/382	173/5527	0.0036876	0.0495413	0.0434238	KIT/GUK1/AK3/ACVR2B/PIK3CA/PIK3R2/AURKB/STK25/TWF1/PFKL/CMPK1/GTF2H3/LIMK2/RIOK3/CCND1/MAP3K7/HYKK/DCK/GALK1/IRAK4/MAPK7/CCNH	22
	GO:0042802	identical protein binding	34/382	307/5527	0.00371559	0.0495413	0.0434238	DES/KIT/TNF/VWF/PON2/PRNP/PAFAH1B3/USO1/CLDN3/JUP/VWA1/APIP/PFKL/MVD/FHL2/NUDT16/PYCRL/RABAC1/SH3GL1/GRPEL2/TIMM9/ACTN1/INHBB/DCK/BCHE/MRI1/ABCG2/USP15/AMOTL2/DNM1L/SNX8/BLOC1S6/SLC39A13/C1QB	34
	D8_GO_MolecularFunction
	ID	Description	GeneRatio	BgRatio	pvalue	p.adjust	qvalue	geneID	Count
	GO:0003674	molecular_function	118/118	4363/5527	5.42e-13	1.66e-10	1.51e-10	POLR2M/TIGD5/H4/HP/SERPINA1/BRB/DES/ELN/LOX/LTF/MTTP/PTN/SCD/VIM/VIP/AMBP/CROT/CXCL2/IL18/PHYH/UGDH/ALDH1A1/COPB2/CRYAB/ITGA5/LOXL4/PLCB4/SOCS3/CCL3/GUCA1A/IGFBP4/PIK3CA/SCNN1A/ADAMTS2/HSD11B2/SERPINF2/GDF9/CHI3L1/LGALS1/AURKB/COL4A4/ST6GALNAC6/TPM2/FCN1/FOXA3/ZPR1/TK1/CRISPLD2/KIF22/SAA2/GALNT6/UBE2C/PI16/APIP/MIOX/CPO/SCP2/HIST1H1D/ASPA/CMPK1/TARS/PRKCDBP/TRMT61A/ASF1B/ABHD1/ACAT1/NRM/GPX8/SCRN…	118
	D14_GO_MolecylarFunction
	ID	Description	GeneRatio	BgRatio	pvalue	p.adjust	qvalue	geneID	Count
	GO:0004872	receptor activity	2018-07-24	224/5527	3.14e-05	0.004988	0.004161	GPR68/PLAUR/PLA2R1/COLEC12/PTAFR/LOXL2/GPR84	7
	GO:0060089	molecular transducer activity	2018-07-24	293/5527	0.000174	0.010662	0.008894	GPR68/PLAUR/PLA2R1/COLEC12/PTAFR/LOXL2/GPR84	7
	GO:0008329	signaling pattern recognition receptor activity	2018-02-24	5527-06-01	0.000268	0.010662	0.008894	COLEC12/PTAFR	2
	GO:0038187	pattern recognition receptor activity	2018-02-24	5527-06-01	0.000268	0.010662	0.008894	COLEC12/PTAFR	2
	GO:0038023	signaling receptor activity	2018-05-24	188/5527	0.001083	0.03444	0.028728	GPR68/PLAUR/COLEC12/PTAFR/GPR84	5
	GO:0030165	PDZ domain binding	2018-02-24	14/5527	0.001593	0.042217	0.035216	ARHGAP29/SDC2	2
